# Supplementary material for: Problems in measuring the JTC-bias in patients with psychotic disorders with the fish task: A secondary analysis of a baseline assessment of a randomized controlled trial
Source: Research Square preprint supplement (doi:10.21203/rs.3.rs-18581/v4), 2020-12-03
Supplement: Supplementary file 1 [file f5481102a179a757e732ae64.docx]

Supplemental Material

Problems in measuring the JTC-bias in patients with psychotic disorders with the fish task: A secondary analysis of a baseline assessment of a randomized controlled trial

This supplement contains supporting information for the above-mentioned manuscript.

|  | **Summary Statistics** |
| --- | --- |
| 2 | **Table S1.** *Summary Statistics for Draws to Decision* |
| 2 | **Table S2.** *Summary Statistics for PANSS total* |
| 2 | **Table S3.** *Summary Statistics for PANSS P06* |
| 2 | **Table S4.** *Summary Statistics for PANSS Positive Factor (Wallwork)* |
| 2 | **Table S5.** *Summary Statistics for PSYRATS Delusional Conviction* |
|  | **Distribution of Variables included in the Analyses** |
| 3 | **Figure S1.** *Distribution of DTD in the total sample* |
| 3 | **Figure S2.** *Distribution of DTD in the Patient Sample* |
| 4 | **Figure S3.** *Distribution of DTD in healthy controls* |
| 4 | **Figure S4.** *Distribution of DTD in Subjects who showed the JTC-bias* |
| 5 | **Figure S5.** *Distribution of DTD in Subjects who did not show the JTC-bias* |
| 5 | **Figure S6.** *Distribution of PANSS total in the Patient Sample* |
| 6 | **Figure S7.** *Distribution of PANSS total in Subjects who showed the JTC-bias* |
| 6 | **Figure S8.** *Distribution of PANSS total in Subjects who did not show the JTC-bias* |
| 7 | **Figure S9.** *Distribution of PANSS P06 in the Patient Sample* |
| 7 | **Figure S10.** *Distribution of PANSS P06 in Subjects who showed the JTC-bias* |
| 8 | **Figure S11.** *Distribution of PANSS P06 in Subjects who did not show the JTC-bias* |
| 8 | **Figure S12.** *Distribution of PANSS Positive Factor (Wallwork) in the Patient Sample* |
| 9 | **Figure S13.** *Distribution of PANSS Positive Factor (Wallwork) in Subjects who showed the JTC-bias* |
| 9 | **Figure S14.** *Distribution of PANSS Positive Factor (Wallwork) in Subjects who did not show the JTC-bias* |
| 10 | **Figure S15.** *Distribution of PSYRATS Delusional Conviction in the Patient Sample* |
| 10 | **Figure S16.** *Distribution of PSYRATS Delusional Conviction in Subjects who showed the JTC-bias* |
| 11 | **Figure S17.** *Distribution of PSYRATS Delusional Conviction who did not show the JTC-bias* |

Summary statistics

**Table S1.**

*Summary Statistics for Draws to Decision assessed with the Fish Task*

|  | N | Min | Max | M | SD | Skewness | | Kurtosis | |
| --- | --- | --- | --- | --- | --- | --- | --- | --- | --- |
|  | Statistic | Statistic | Statistic | Statistic | Statistic | Statistic | Std. Error | Statistic | Std. Error |
| Total Sample | 351 | 1 | 11 | 3.15 | 2.669 | 1.419 | .130 | 1.503 | .260 |
| Patients | 300 | 1 | 11 | 3.10 | 2.700 | 1.522 | .141 | .007 | .281 |
| Controls | 51 | 1 | 11 | 3.49 | 2.477 | .756 | .333 | .027 | .656 |
| JTC-bias YES | 182 | 1 | 2 | 1.20 | .404 | 1.487 | .180 | .213 | .358 |
| JTC-bias NO | 169 | 3 | 11 | 5.25 | 2.471 | 1.143 | .187 | .485 | .371 |

**Table S2.**

*Summary Statistics for PANSS total*

|  | N | Min | Max | M | SD | Skewness | | Kurtosis | |
| --- | --- | --- | --- | --- | --- | --- | --- | --- | --- |
|  | Statistic | Statistic | Statistic | Statistic | Statistic | Statistic | Std. Error | Statistic | Std. Error |
| Patients | 300 | 37 | 97 | 64.87 | 11.427 | .318 | .141 | .007 | .281 |
| JTC-bias YES | 161 | 41 | 97 | 66.98 | 12.278 | .279 | .191 | -.354 | .380 |
| JTC-bias NO | 139 | 37 | 922 | 62.42 | 9.844 | .039 | .206 | .108 | .408 |

Notes: PANSS = Positive and Negative Syndrome Scale

**Table S3.**

*Summary Statistics for PANSS P06 Persecutory delusions*

|  | N | Min | Max | M | SD | Skewness | | Kurtosis | |
| --- | --- | --- | --- | --- | --- | --- | --- | --- | --- |
|  | Statistic | Statistic | Statistic | Statistic | Statistic | Statistic | Std. Error | Statistic | Std. Error |
| Patients | 300 | 1 | 7 | 3.48 | 1.480 | -.328 | .141 | -.690 | .281 |
| JTC-bias YES | 161 | 1 | 7 | 3.53 | 1.529 | -.273 | .191 | -.721 | .380 |
| JTC-bias NO | 139 | 1 | 6 | 3.42 | 1.424 | -.434 | .206 | .012 | .408 |

Notes: PANSS = Positive and Negative Syndrome Scale

**Table S4.**

*Summary Statistics for PANSS Positive Factor (Wallwork)*

|  | N | Min | Max | M | SD | Skewness | | Kurtosis | |
| --- | --- | --- | --- | --- | --- | --- | --- | --- | --- |
|  | Statistic | Statistic | Statistic | Statistic | Statistic | Statistic | Std. Error | Statistic | Std. Error |
| Patients | 300 | 7 | 23 | 11.65 | 2.725 | .622 | .141 | .424 | .281 |
| JTC-bias YES | 161 | 7 | 19 | 11.79 | 2.448 | .365 | .191 | -.100 | .380 |
| JTC-bias NO | 139 | 7 | 23 | 11.50 | 3.015 | .829 | .206 | .654 | .408 |

Notes: PANSS = Positive and Negative Syndrome Scale

**Table S5.**

*Summary Statistics for PSYRATS Delusional Conviction*

|  | N | Min | Max | M | SD | Skewness | | Kurtosis | |
| --- | --- | --- | --- | --- | --- | --- | --- | --- | --- |
|  | Statistic | Statistic | Statistic | Statistic | Statistic | Statistic | Std. Error | Statistic | Std. Error |
| Patients | 300 | 0 | 4 | 2.57 | 1.224 | -.812 | .141 | -.248 | .281 |
| JTC-bias YES | 161 | 0 | 4 | 2.59 | 1.272 | -.758 | .191 | -.411 | .380 |
| JTC-bias NO | 139 | 0 | 4 | 2.54 | 1.169 | -.912 | .206 | .012 | .408 |

Notes: PSYRATS = Psychotic Symptoms Rating Scales

**Distribution of DTD**

**Figure S1.**

*Distribution of DTD in the total sample*


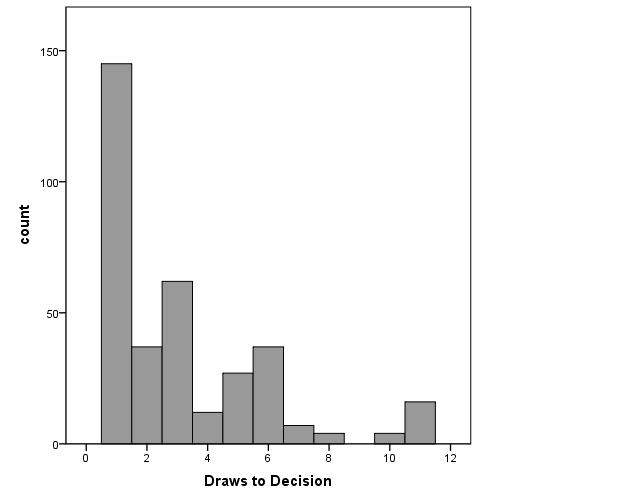


Notes: DTD = Draws to decision

**Figure S2.**

*Distribution of DTD in the Patient Sample*


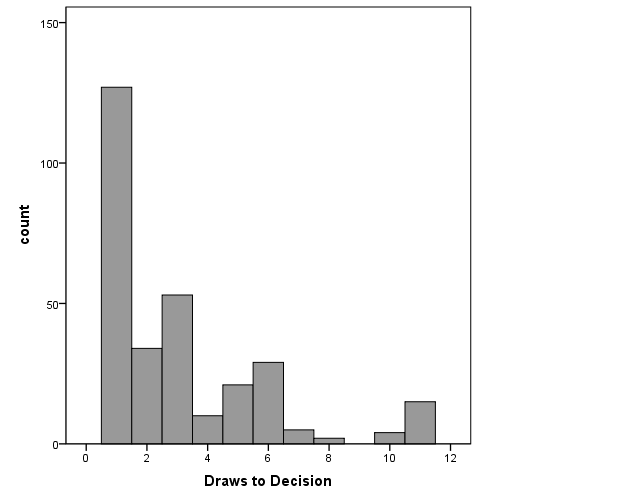


Notes: DTD = Draws to decision

**Figure S3.**

*Distribution of DTD in healthy controls*


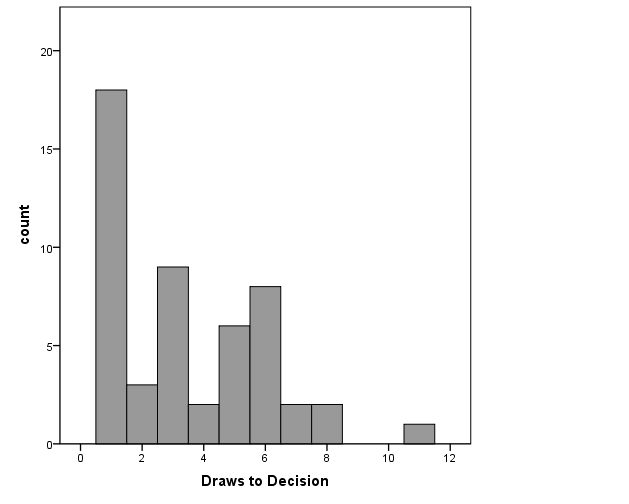


Notes: DTD = Draws to decision

**Figure S4.**

*Distribution of DTD in Subjects who showed the JTC-bias*


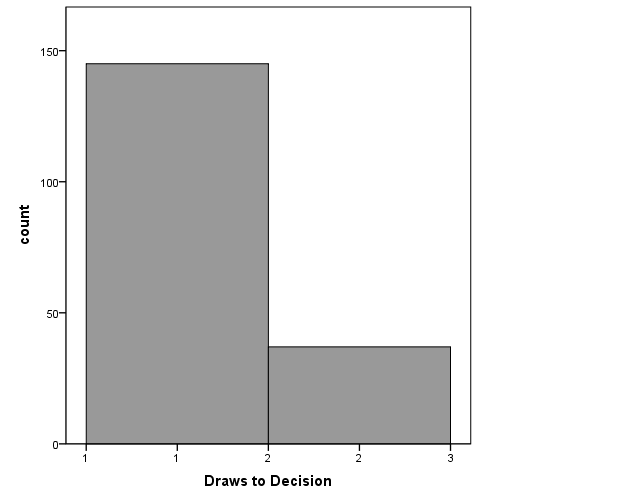


Notes: DTD = Draws to decision, JTC = jumping to conclusions

**Figure S5.**

*Distribution of DTD in Subjects who did not show the JTC-bias*


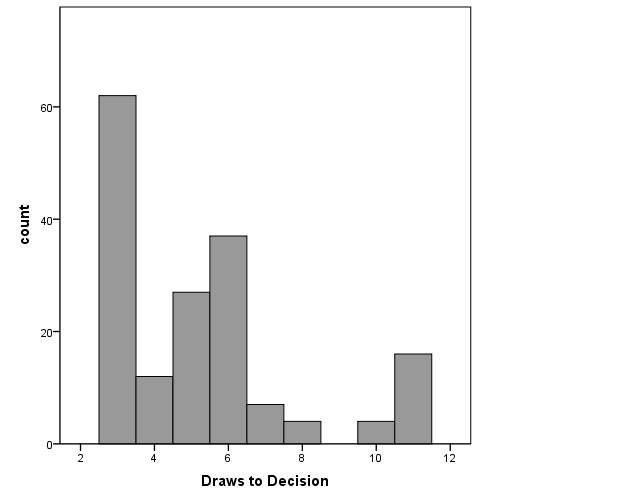


Notes: DTD = Draws to decision, JTC = jumping to conclusions

**Distribution of PANSS total**

**Figure S6.**

*Distribution of PANSS total in the Patient Sample*


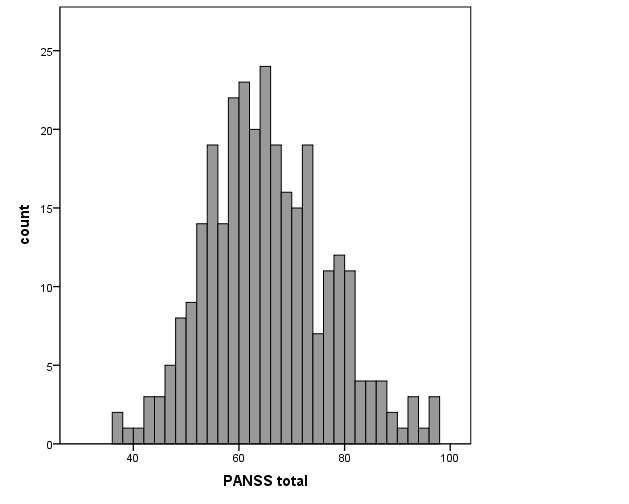


Notes: PANSS = Positive and Negative Syndrome Scale

**Figure S7.**

*Distribution of PANSS total in Subjects who showed the JTC-bias*


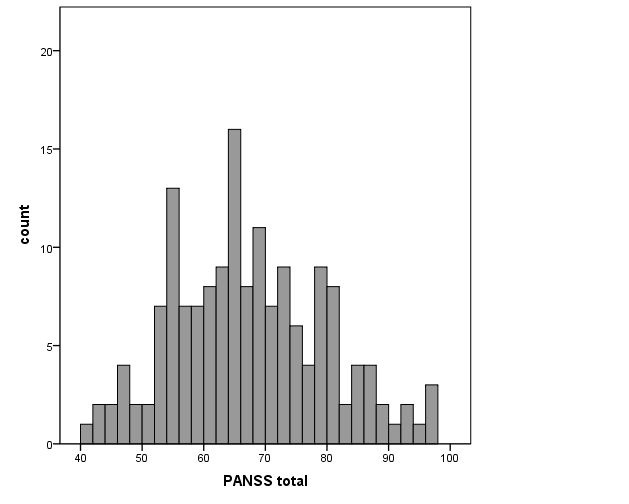


Notes: PANSS = Positive and Negative Syndrome Scale

**Figure S8.**

*Distribution of PANSS total in Subjects who did not show the JTC-bias*


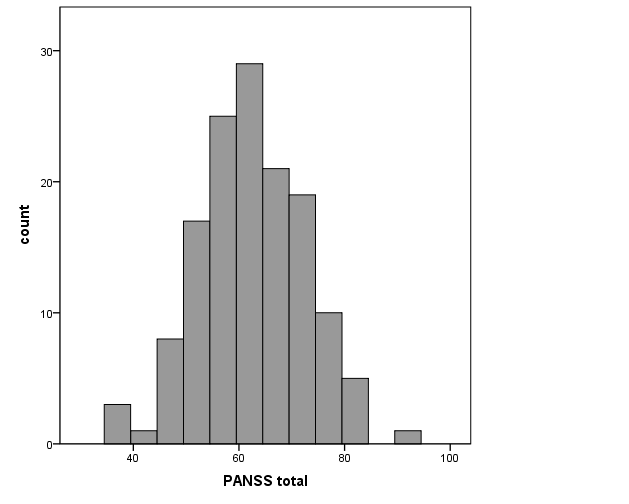


Notes: PANSS = Positive and Negative Syndrome Scale, JTC = Jumping to conclusions

**Distribution of PANSS P06**

**Figure S9.**

*Distribution of PANSS P06 item in the Patient Sample*


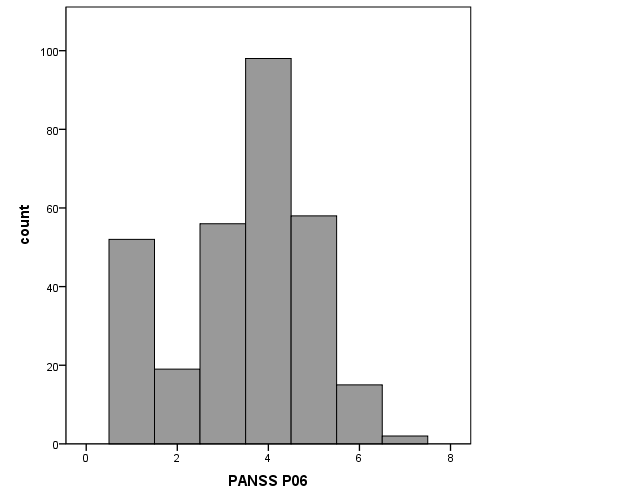


Notes: PANSS = Positive and Negative Syndrome Scale

**Figure S10.**

*Distribution of PANSS P06 item in Subjects who showed the JTC-bias*


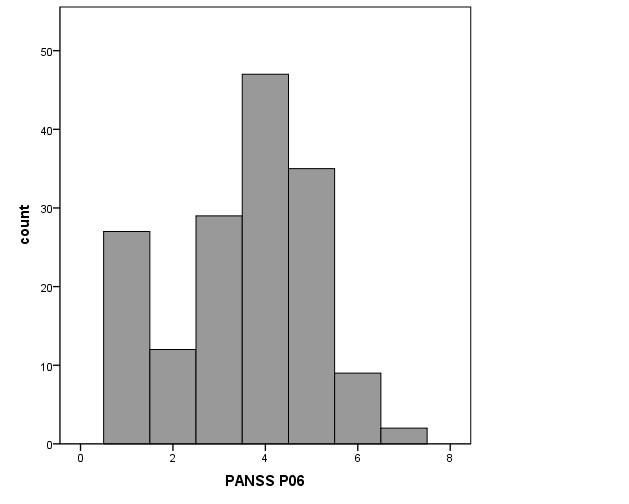


Notes: PANSS = Positive and Negative Syndrome Scale, JTC = jumping to conclusions

**Figure S11.**

*Distribution of PANSS P06 item in Subjects who did not show the JTC-bias*


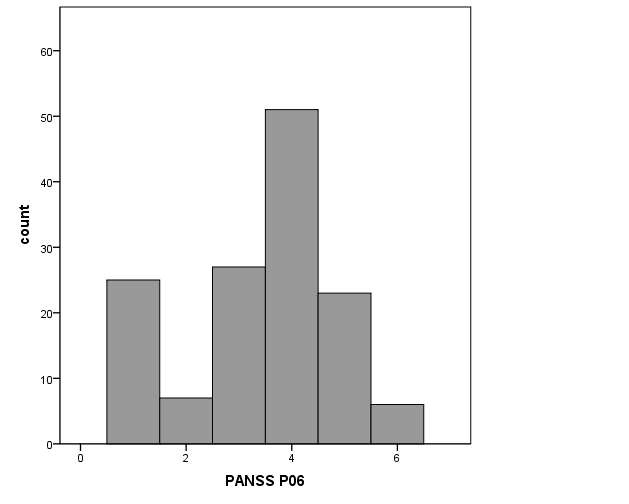


Notes: PANSS = Positive and Negative Syndrome Scale, JTC = Jumping to conclusions

**Distribution of PANSS Positive Factor (Wallwork)**

**Figure S12.**

*Distribution of PANSS Positive Factor (Wallwork) in the Patient Sample*
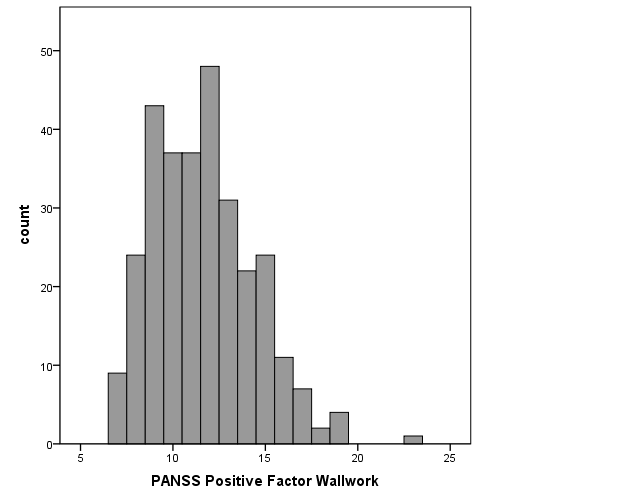


Notes: PANSS = Positive and Negative Syndrome Scale

**Figure S13.**

*Distribution of PANSS Positive Factor (Wallwork) in Subjects who showed the JTC-bias*


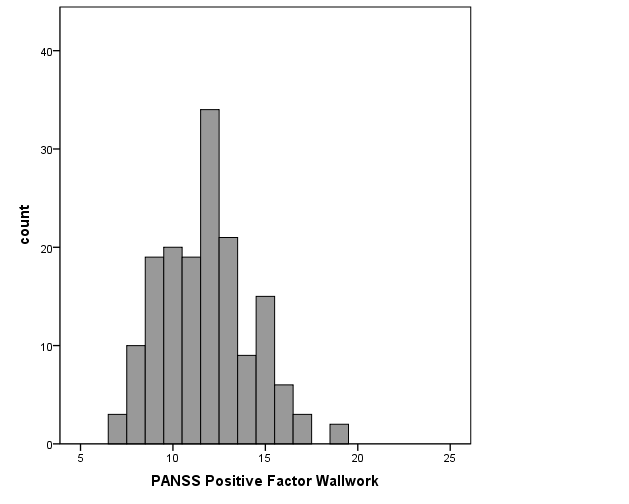


Notes: PANSS = Positive and Negative Syndrome Scale, JTC = Jumping to conclusions

**Figure S14.**

*Distribution of PANSS Positive Factor (Wallwork) in Subjects who did not show the JTC-bias*


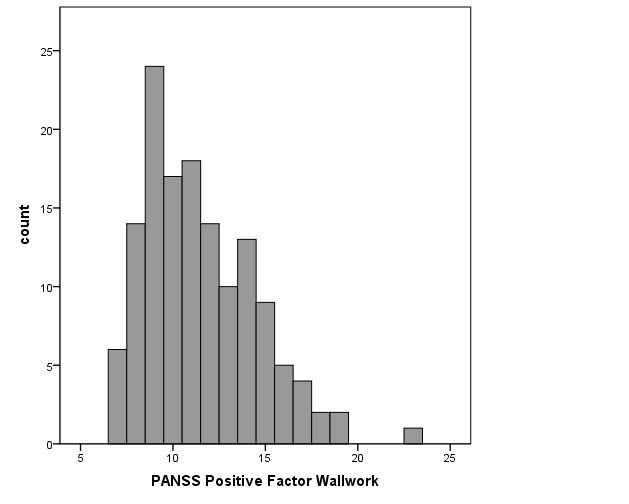


Notes: PANSS = Positive and Negative Syndrome Scale, JTC = Jumping to conclusions

**Distribution of PSYRATS Delusional Conviction**

**Figure S15.**

*Distribution of PSYRATS Delusional Conviction in the Patient Sample*


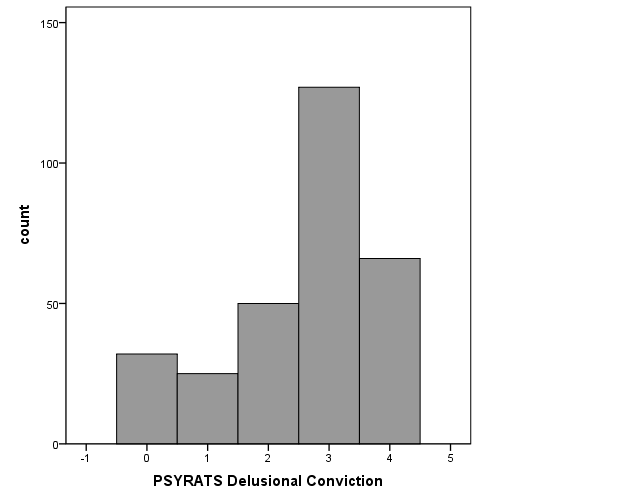


Notes: PSYRATS = Psychotic Symptoms Rating Scales

**Figure S16.**

*Distribution of PSYRATS Delusional Conviction in Subjects who showed the JTC-bias*


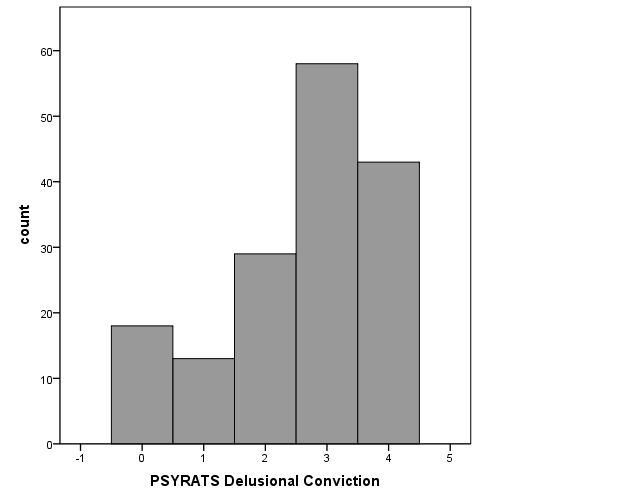


Notes: PSYRATS = Psychotic Symptoms Ratings Scale, JTC = Jumping to conclusions

**Figure S17.**

*Distribution of PSYRATS Delusional Conviction who did not show the JTC-bias*


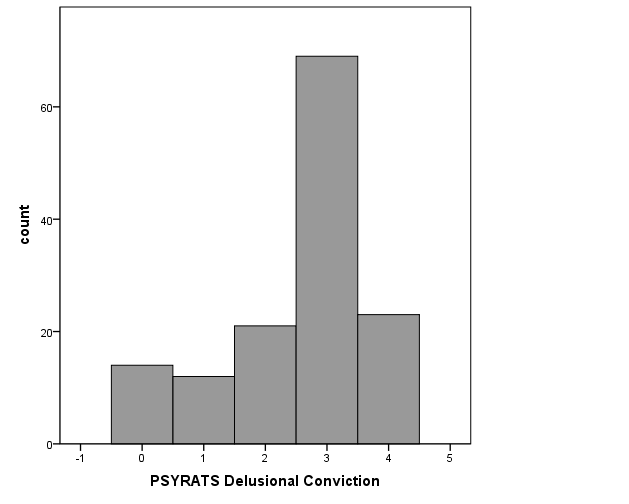


Notes: PSYRATS = Psychotic Symptoms Ratings Scale, JTC = Jumping to conclusions
